# Supplementary material for: Design and synthesis of supramolecular functional monomers bearing urea and norbornene motifs
Source: Royal Society of Chemistry journal article supplement (doi:10.1039/c9ra01852b), 2019-01-01
Supplement: c9ra01852b1.pdf [file c9ra01852b1.pdf]

## Supporting Information

# Design and synthesis of supramolecular functional monomers bearing urea and norbornene motifs

Lulu Wang<sup>1,2,3</sup>, Qifeng Lin<sup>4</sup>, Yagang Zhang<sup>1,2,3\*</sup>, Yanxia Liu<sup>1,2,3</sup>, Akram Yasin<sup>1</sup>, Letao Zhang<sup>1</sup>

<sup>1</sup> Xinjiang Technical Institute of Physics and Chemistry, Chinese Academy of Sciences, Urumqi 830011, China

<sup>2</sup> Department of chemical and environmental engineering, Xinjiang Institute of Engineering, Urumqi 830023, China;

<sup>3</sup> University of Chinese Academy of Sciences, Beijing 100049, China

<sup>4</sup> Xinjiang institute of ecology and geography, The Chinese Academy of Sciences, Urumqi, Xinjiang 830011, China

\* Correspondence: ygzhang@ms.xjb.ac.cn; Tel.: +86-18129307169

### Table of Contents

|                                                              |    |
|--------------------------------------------------------------|----|
| <sup>1</sup> H NMR, <sup>13</sup> C NMR and MS Spectra ..... | 2  |
| Adsorption kinetic of BHA/BHT .....                          | 14 |

# <sup>1</sup>H NMR, <sup>13</sup>C NMR and MS Spectra.

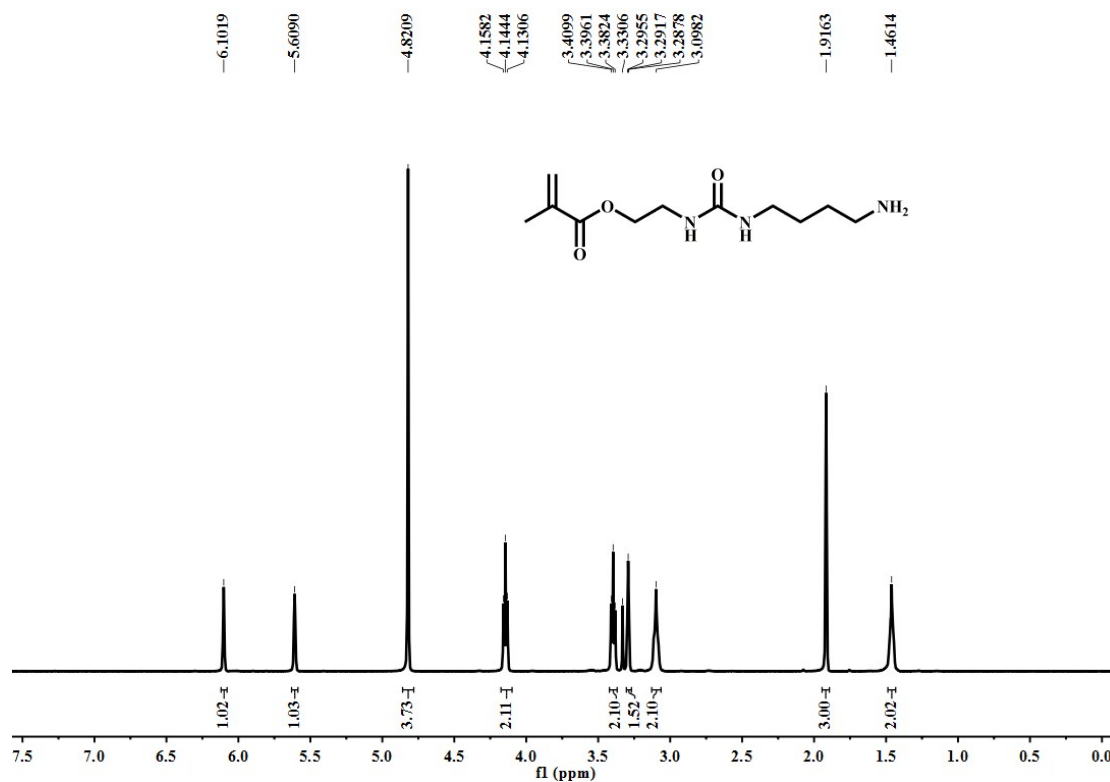

Figure S1. Compound 2a <sup>1</sup>H NMR (400 MHz, CD<sub>3</sub>OD)

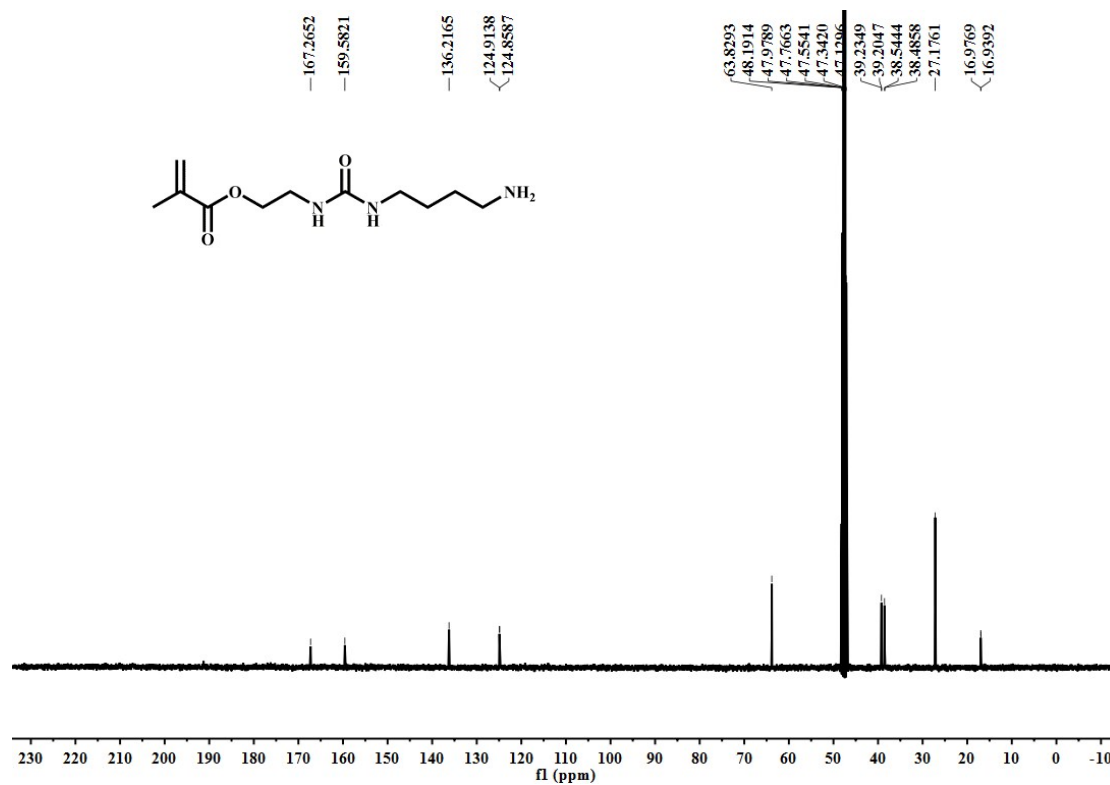

Figure S2. Compound 2a <sup>13</sup>C NMR (400 MHz, CD<sub>3</sub>OD)

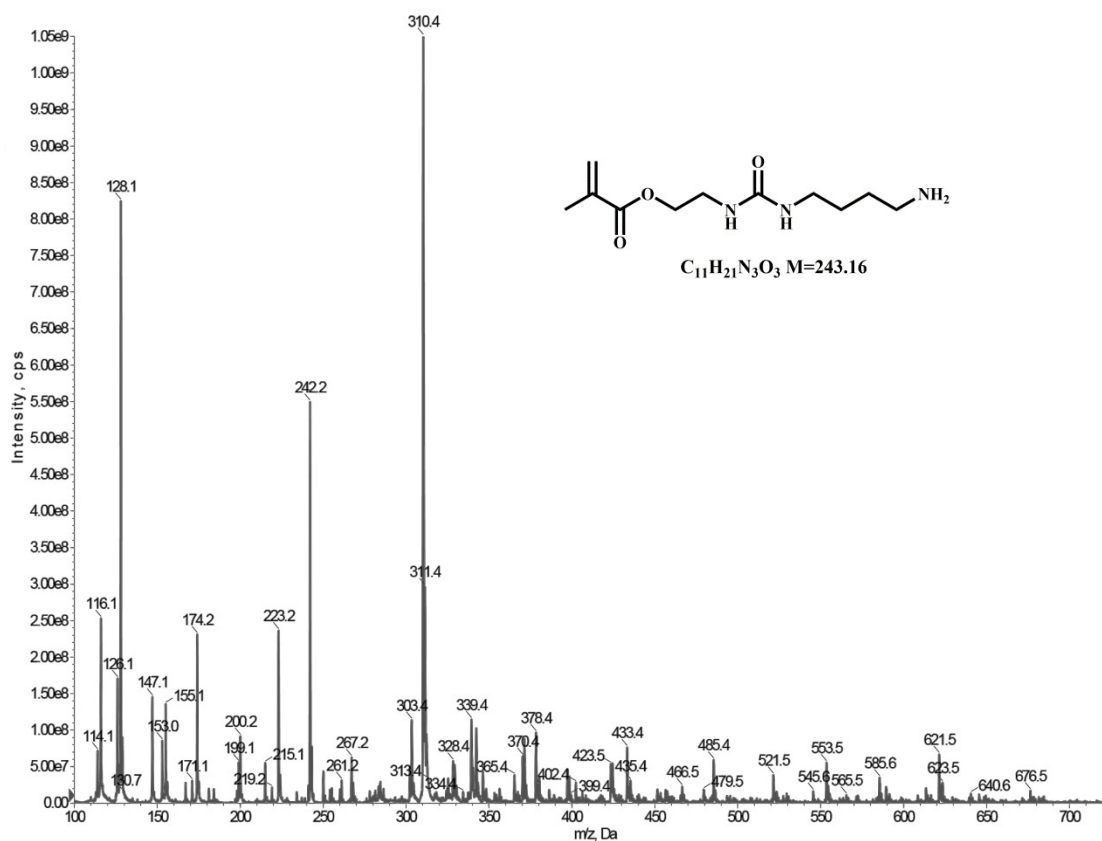

Figure S3. Compound 2a MS

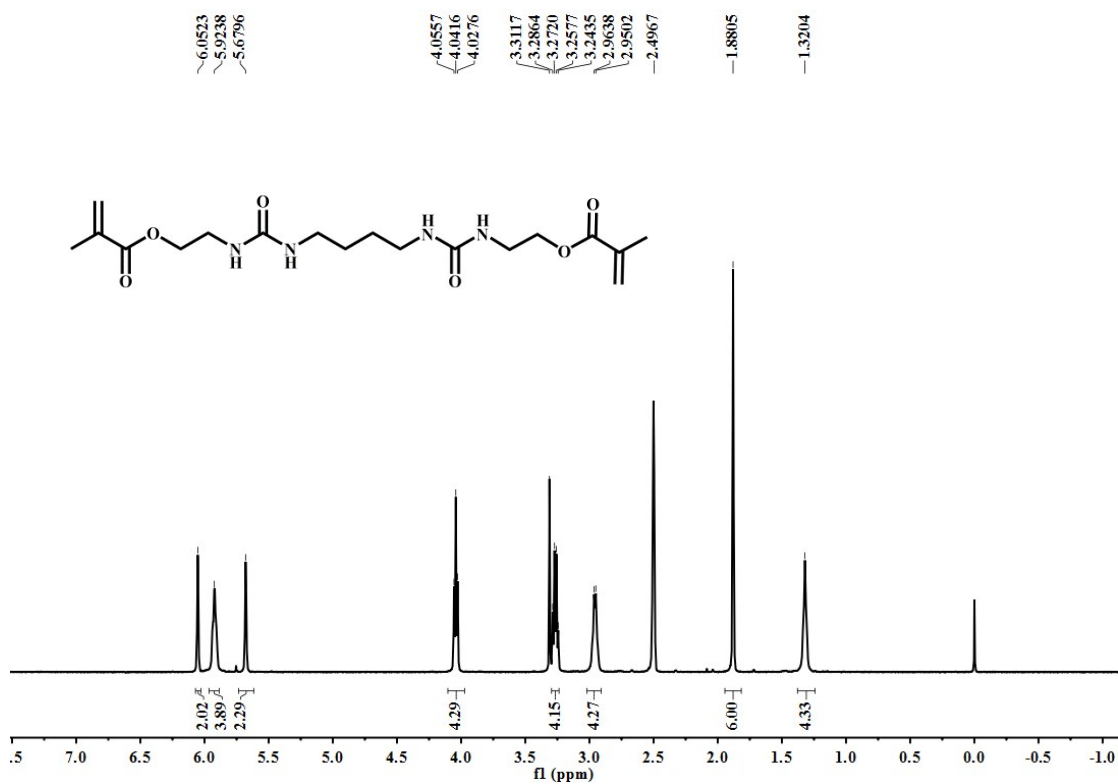

Figure S4. Compound 2c  $^1H$  NMR (400 MHz, DMSO- $d_6$ )

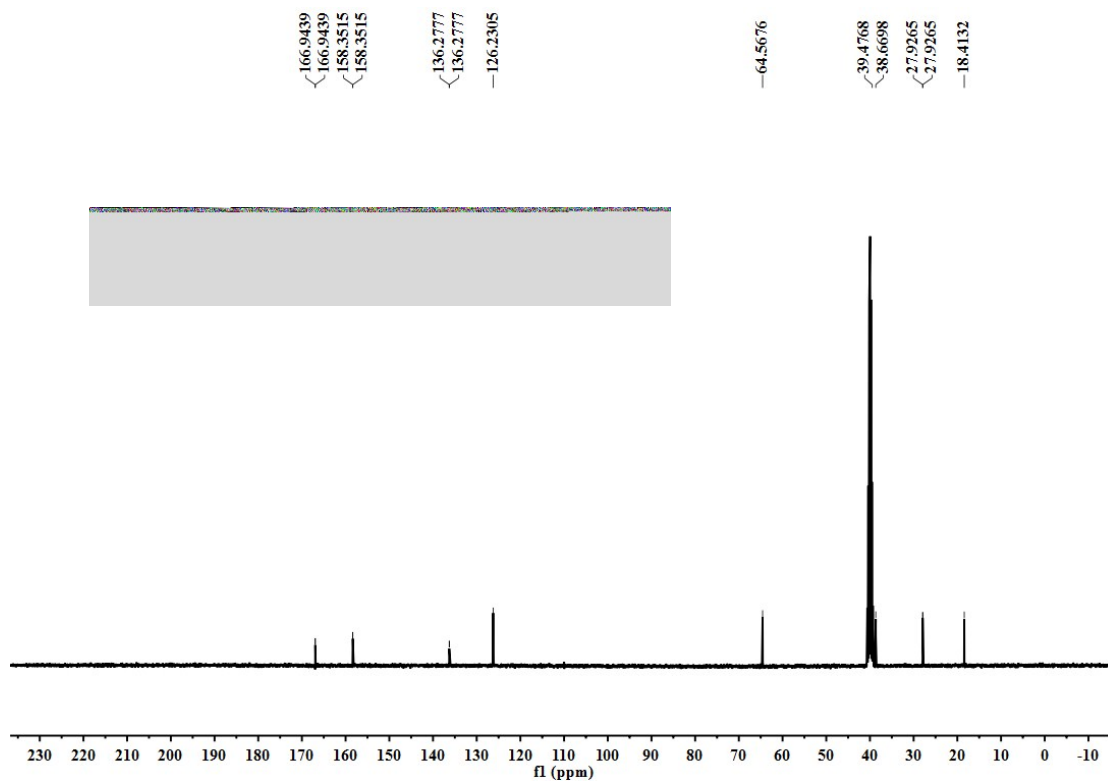

Figure S5. Compound 2c  $^{13}\text{C}$  NMR (400 MHz,  $\text{DMSO-d}_6$ )

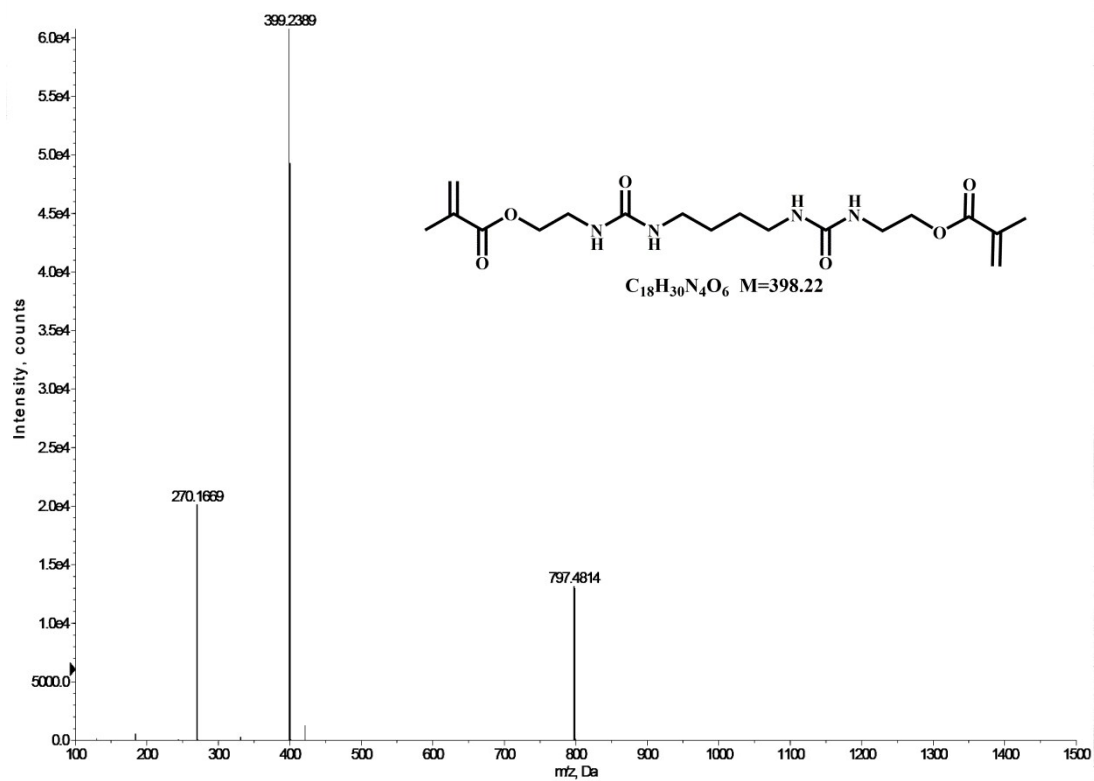

Figure S6. Compound 2c MS

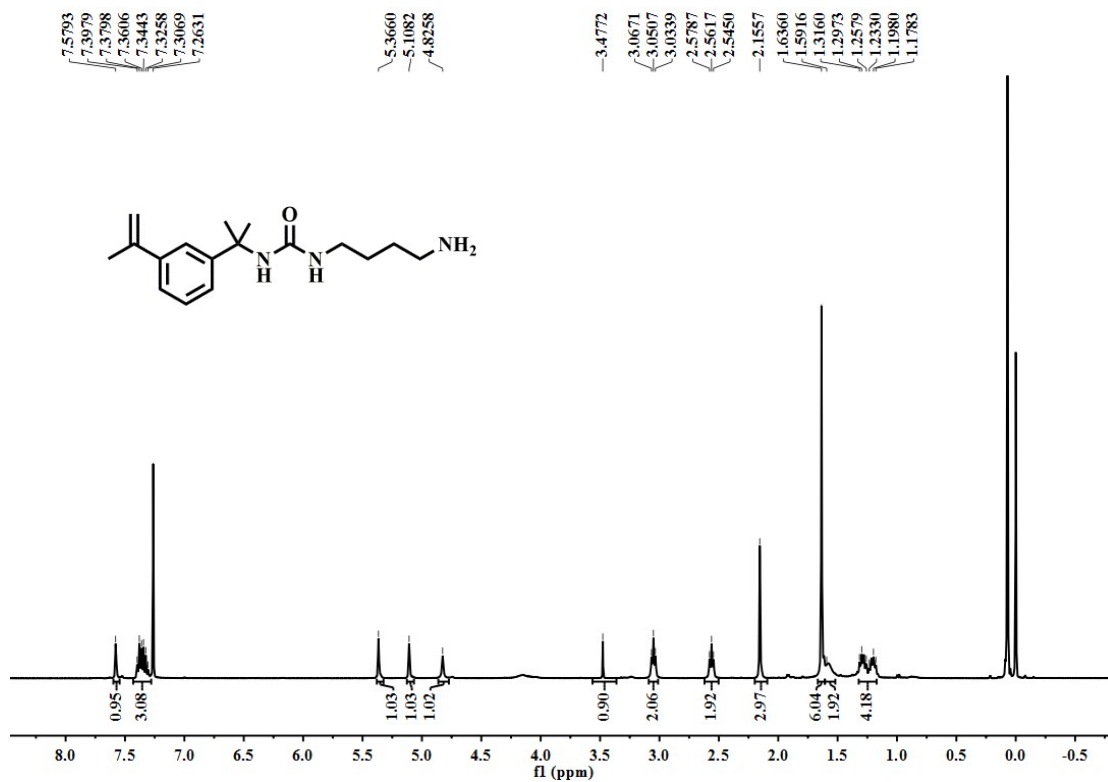

Figure S7. Compound 2b <sup>1</sup>H NMR (400 MHz, CDCl<sub>3</sub>)

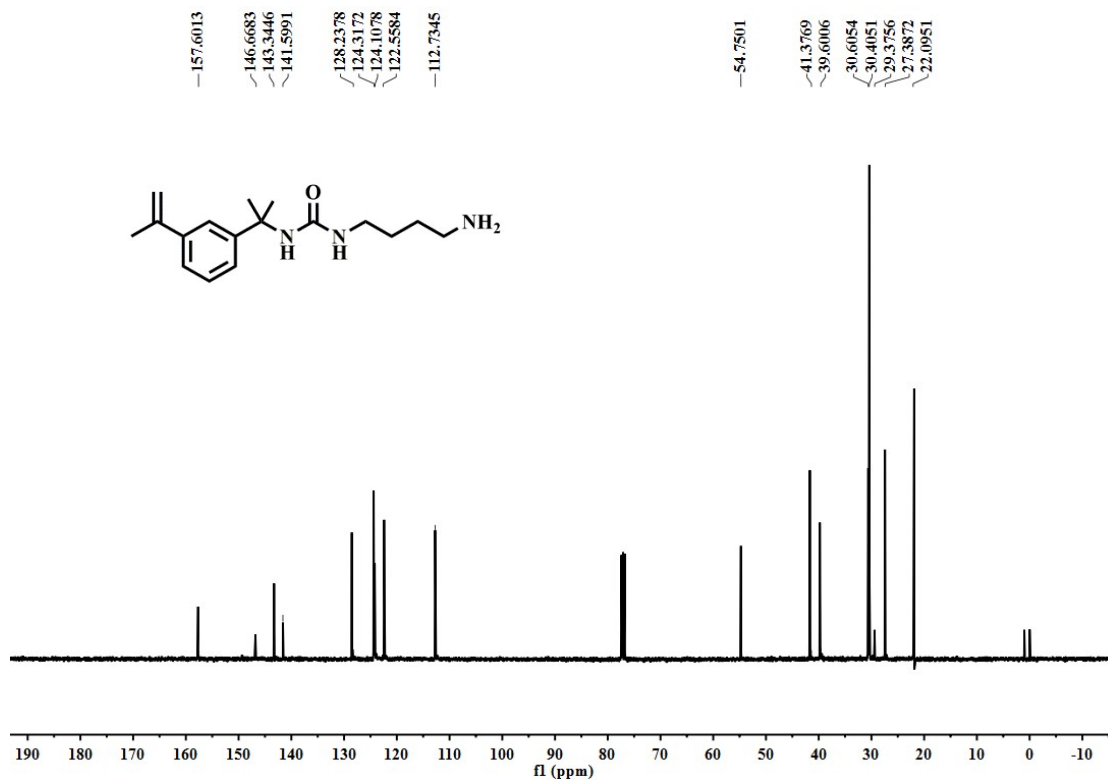

Figure S8. Compound 2b <sup>13</sup>C NMR (400 MHz, CDCl<sub>3</sub>)

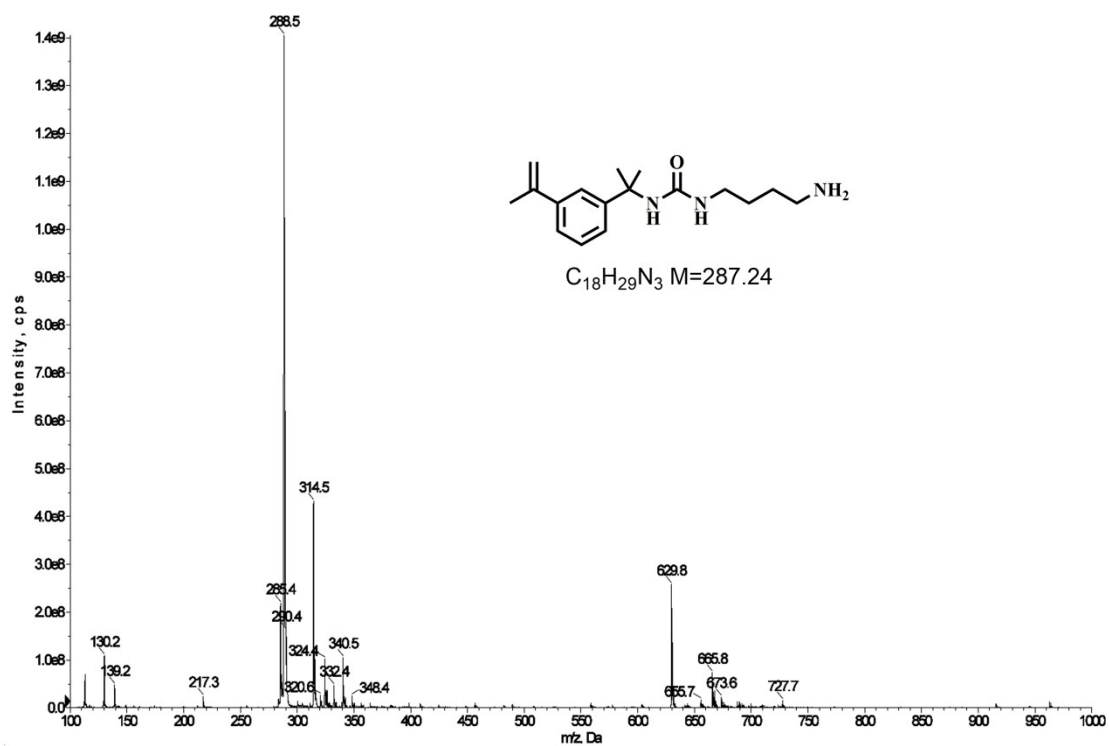

Figure S9. Compound 2b MS

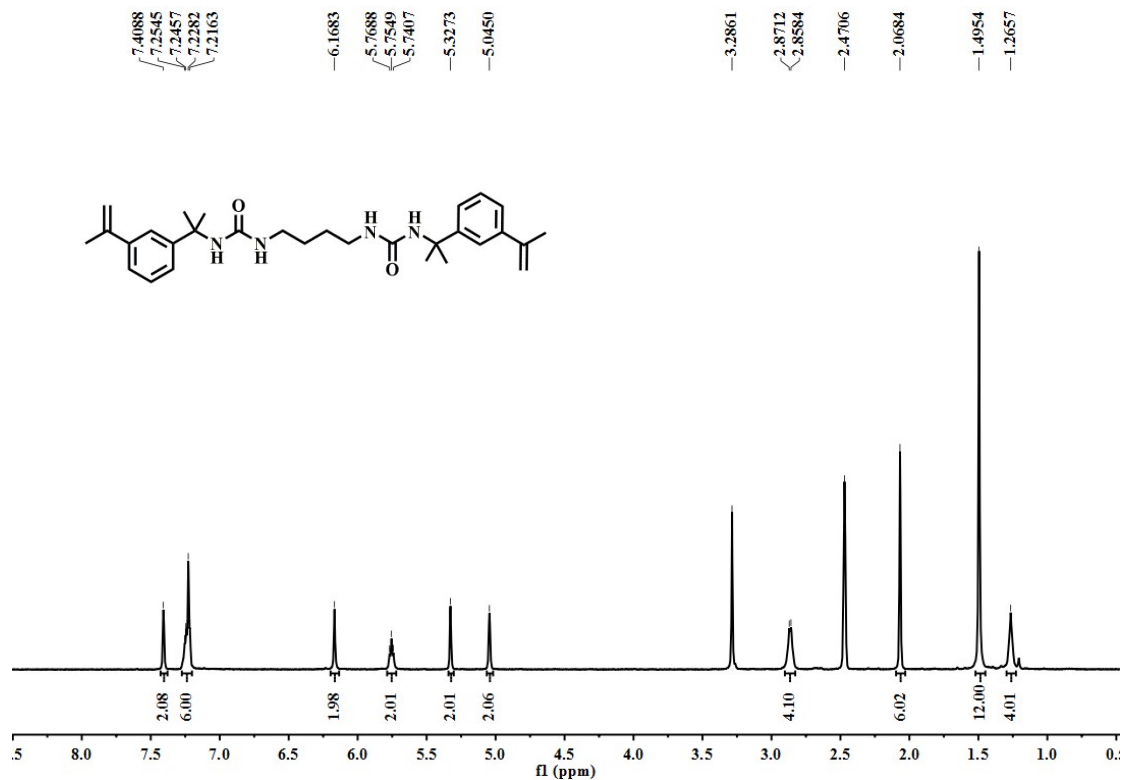

Figure S10. Compound 2d  $^1H$  NMR (400 MHz, DMSO- $d_6$ )

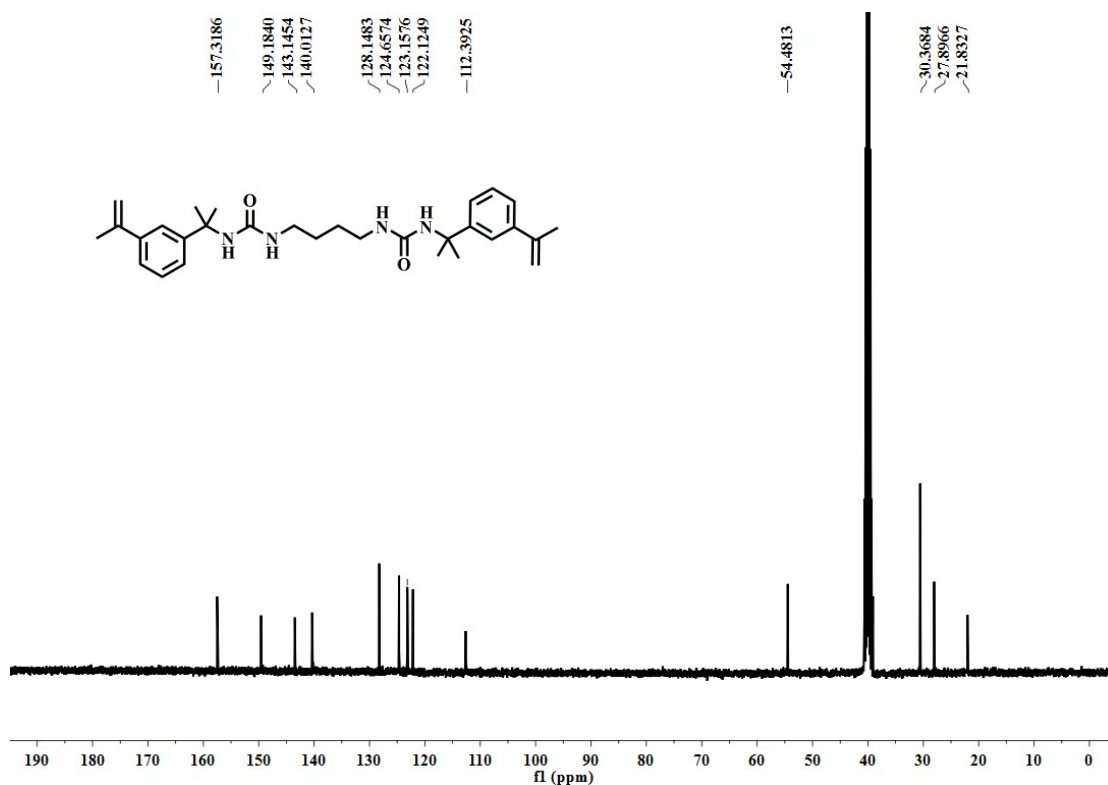

Figure S11. Compound 2d <sup>13</sup>C NMR (400 MHz, DMSO-d<sub>6</sub>)

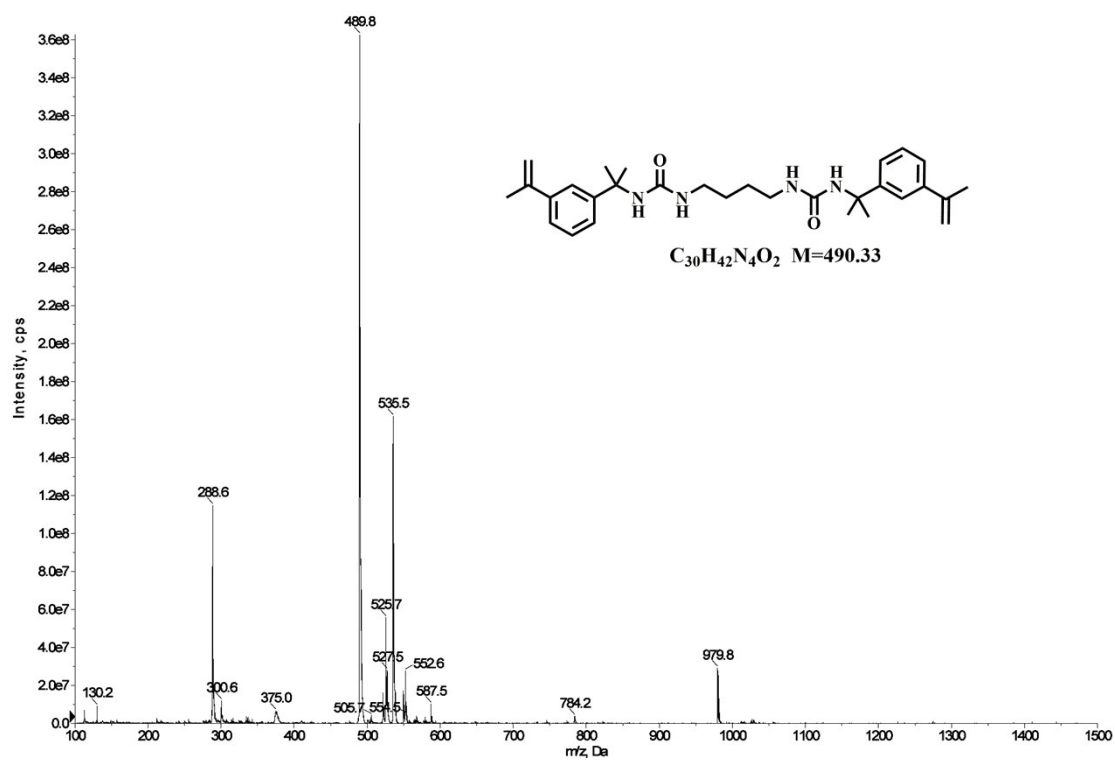

Figure S12. Compound 2d MS

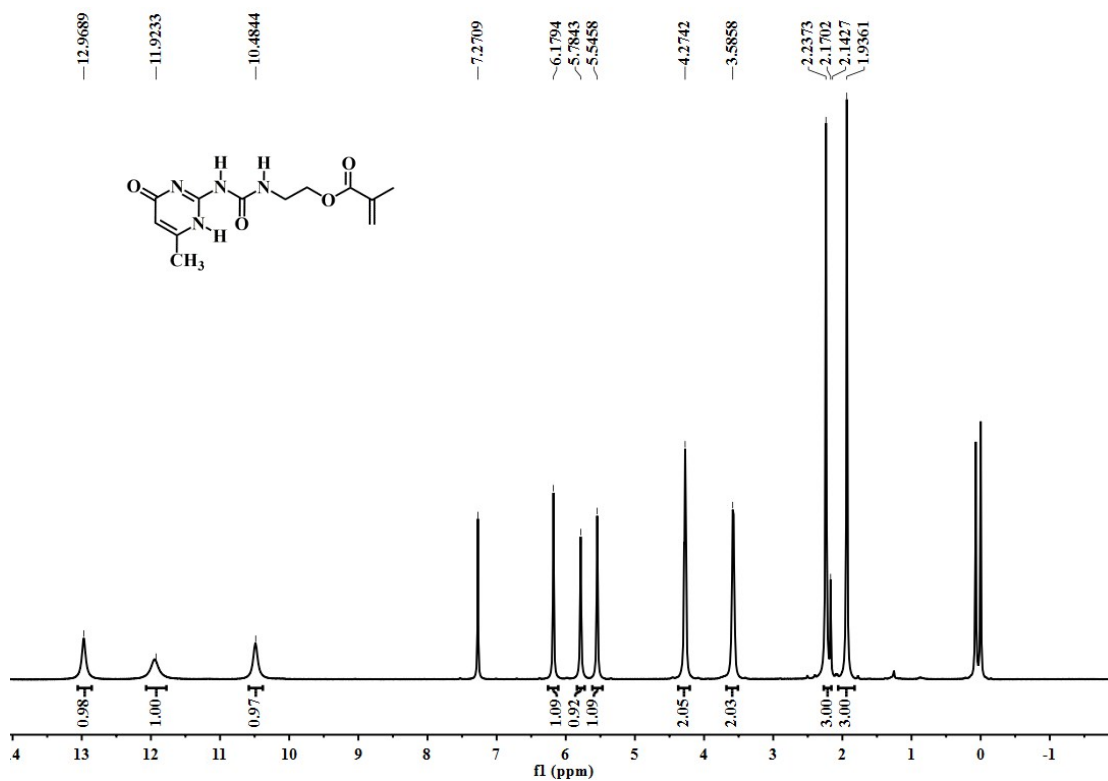

Figure S13. Compound 3a <sup>1</sup>H NMR (400 MHz, CDCl<sub>3</sub>)

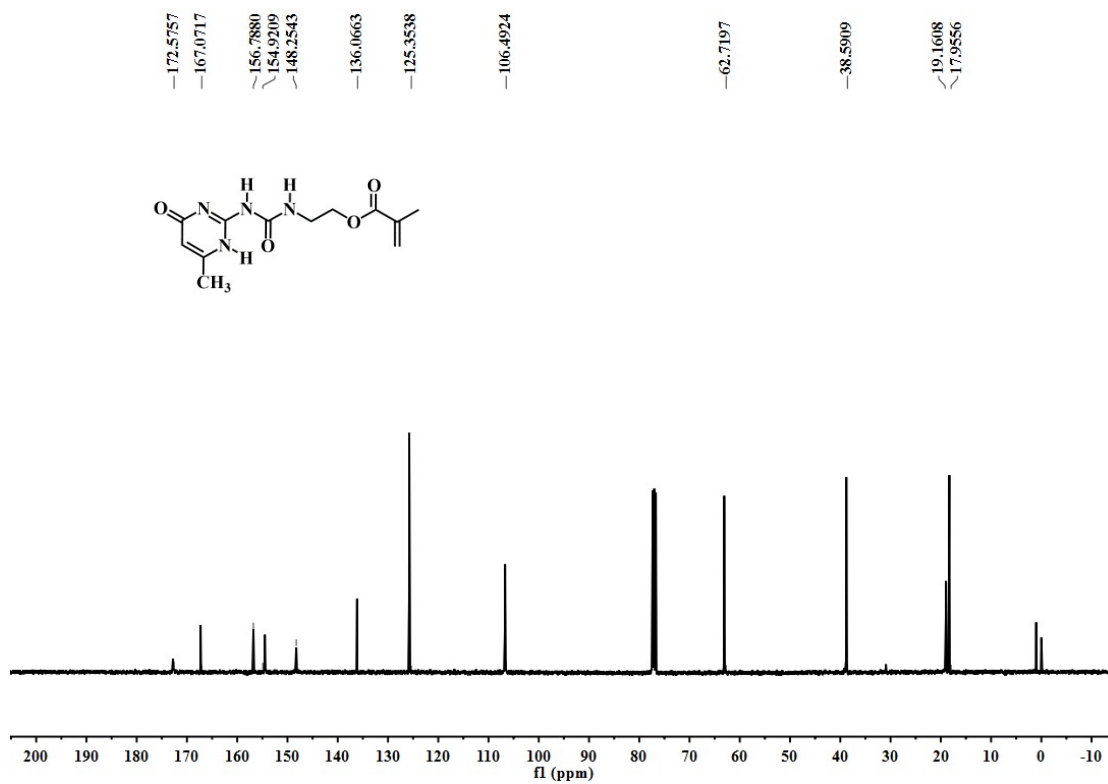

Figure S14. Compound 3a <sup>13</sup>C NMR (400 MHz, CDCl<sub>3</sub>)



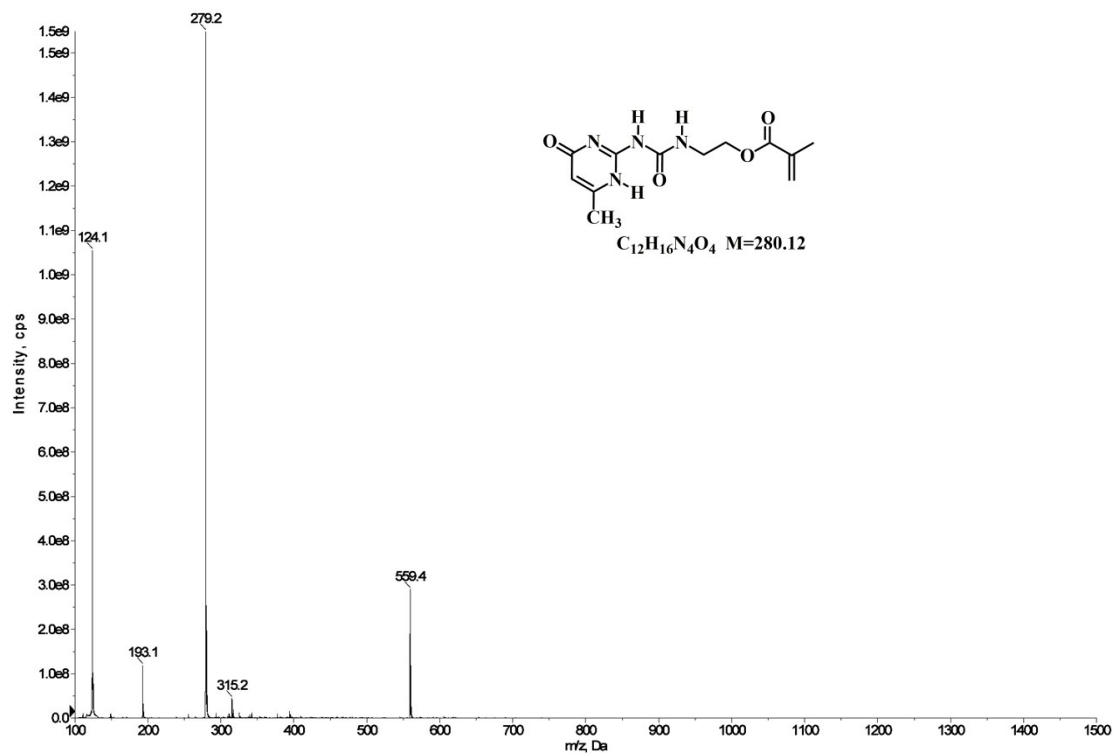

Figure S15. Compound 3a MS

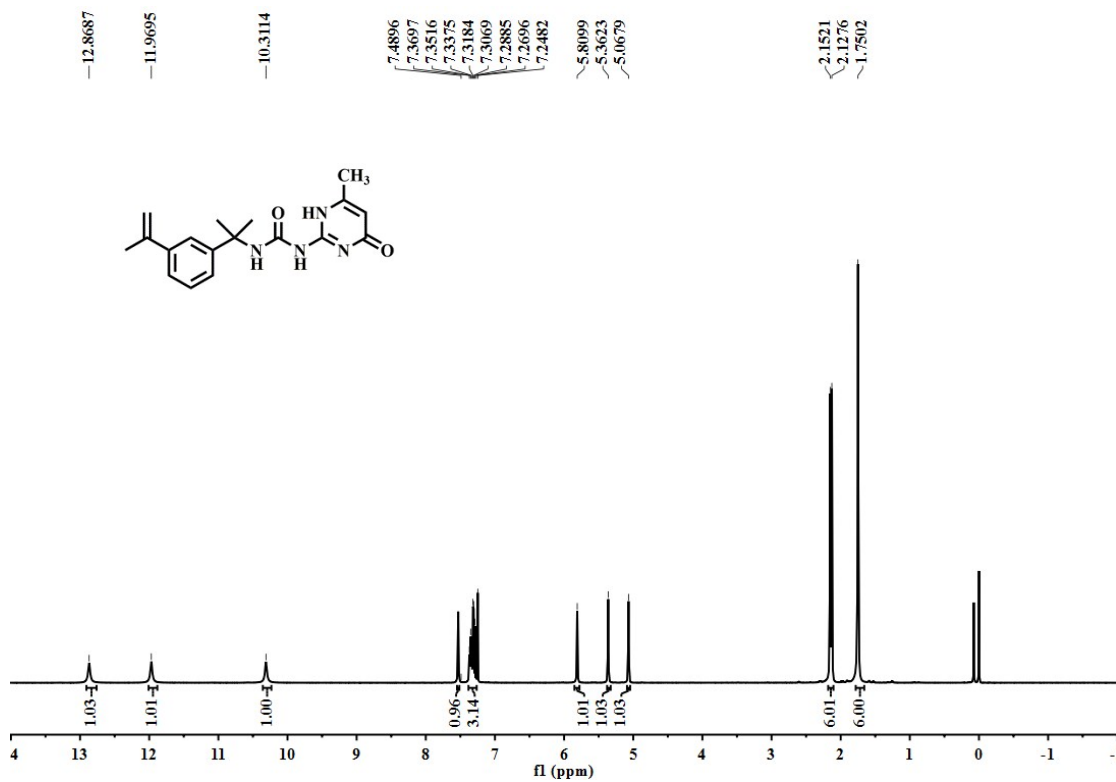

Figure S16. Compound 3b  $^1H$  NMR (400 MHz,  $CDCl_3$ )

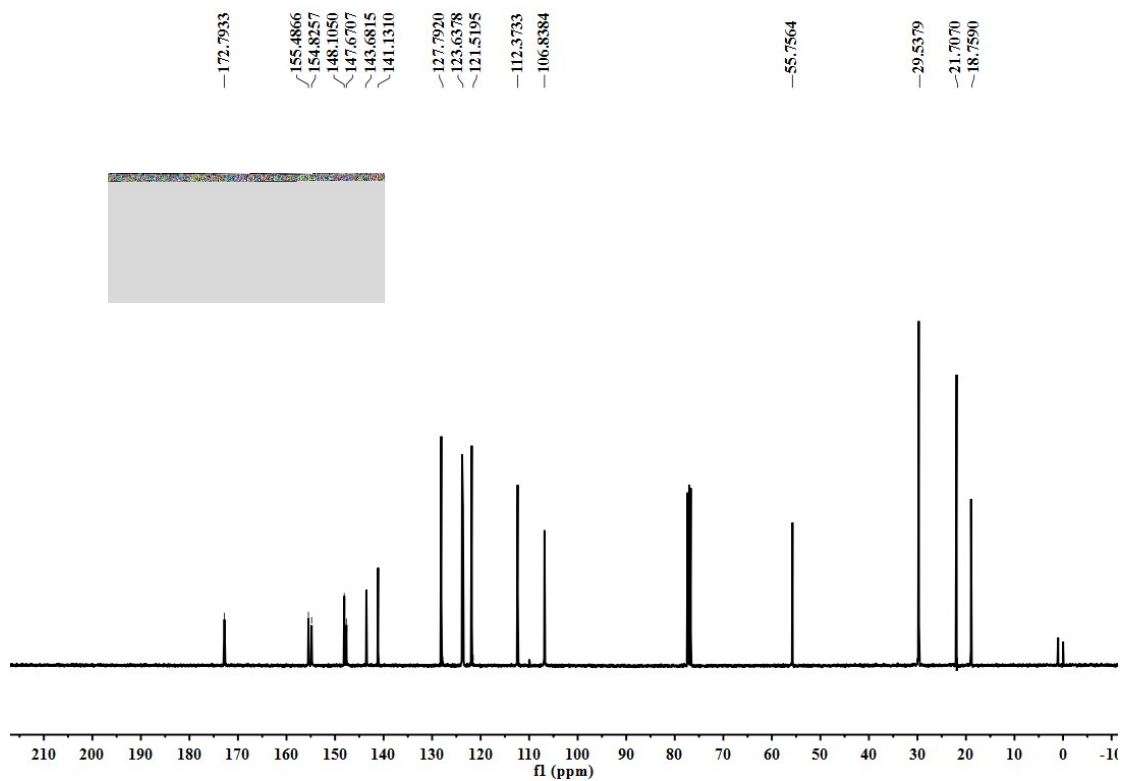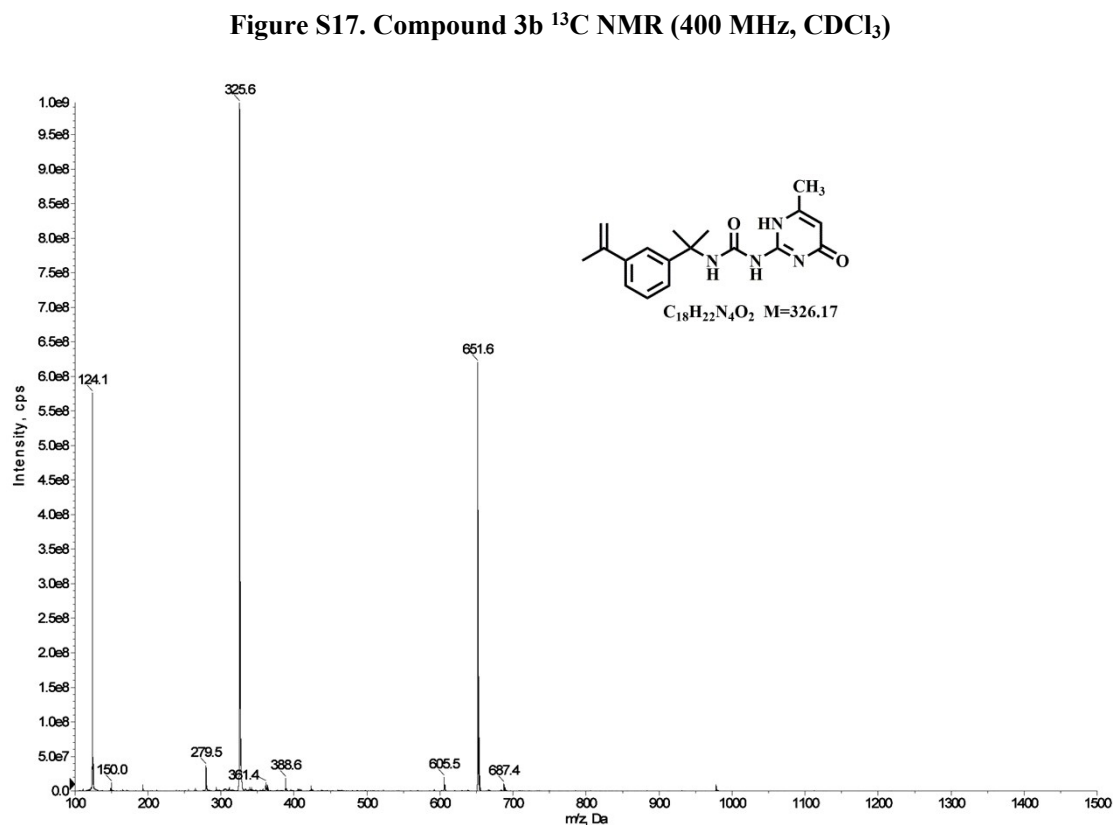

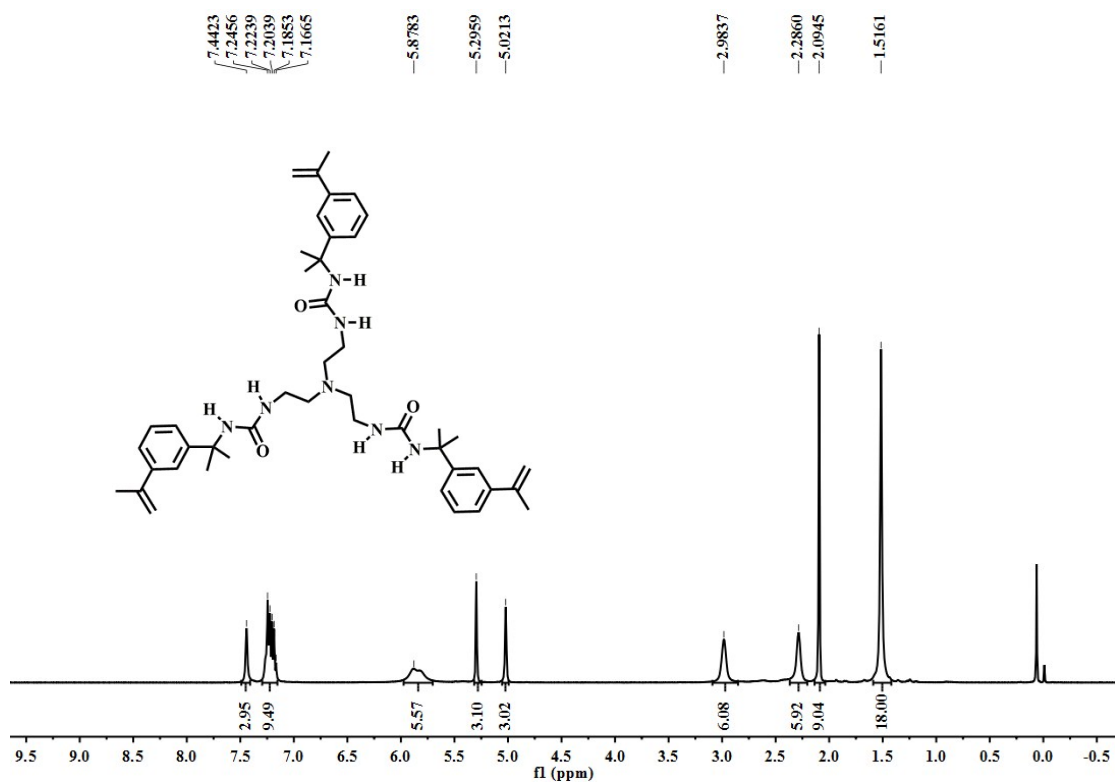

Figure S19. Compound 4  $^1\text{H}$  NMR (400 MHz,  $\text{CDCl}_3$ )

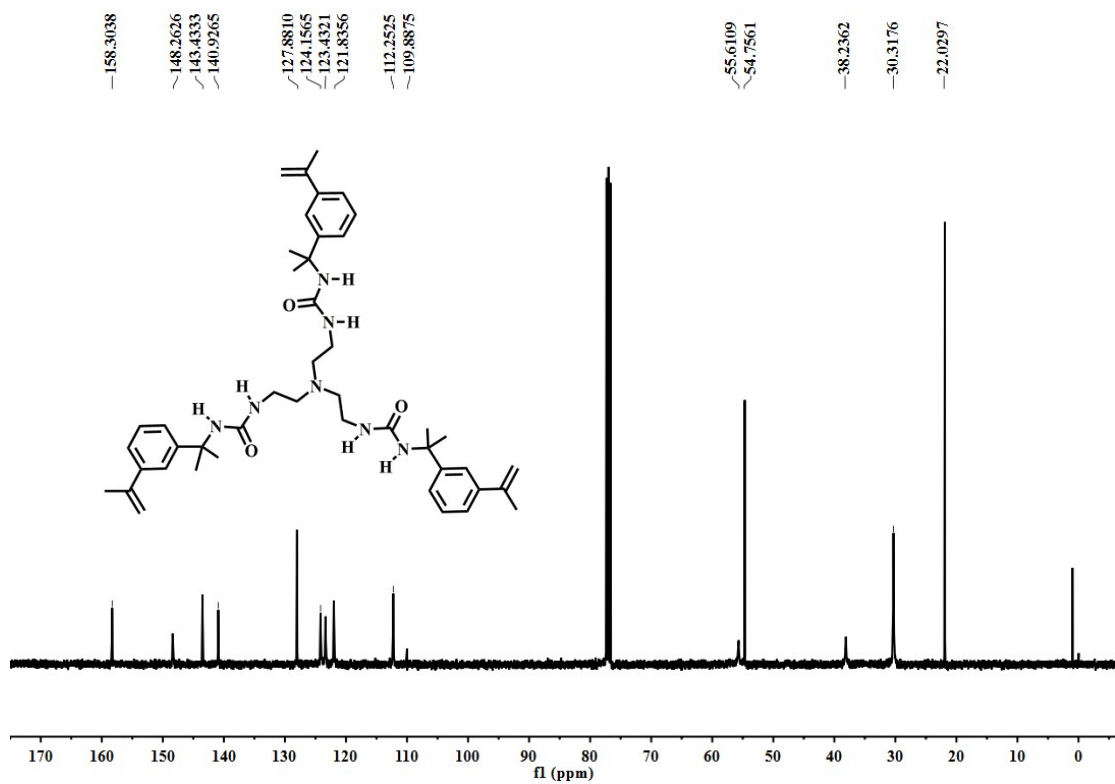

Figure S20. Compound 4  $^{13}\text{C}$  NMR (400 MHz,  $\text{CDCl}_3$ )

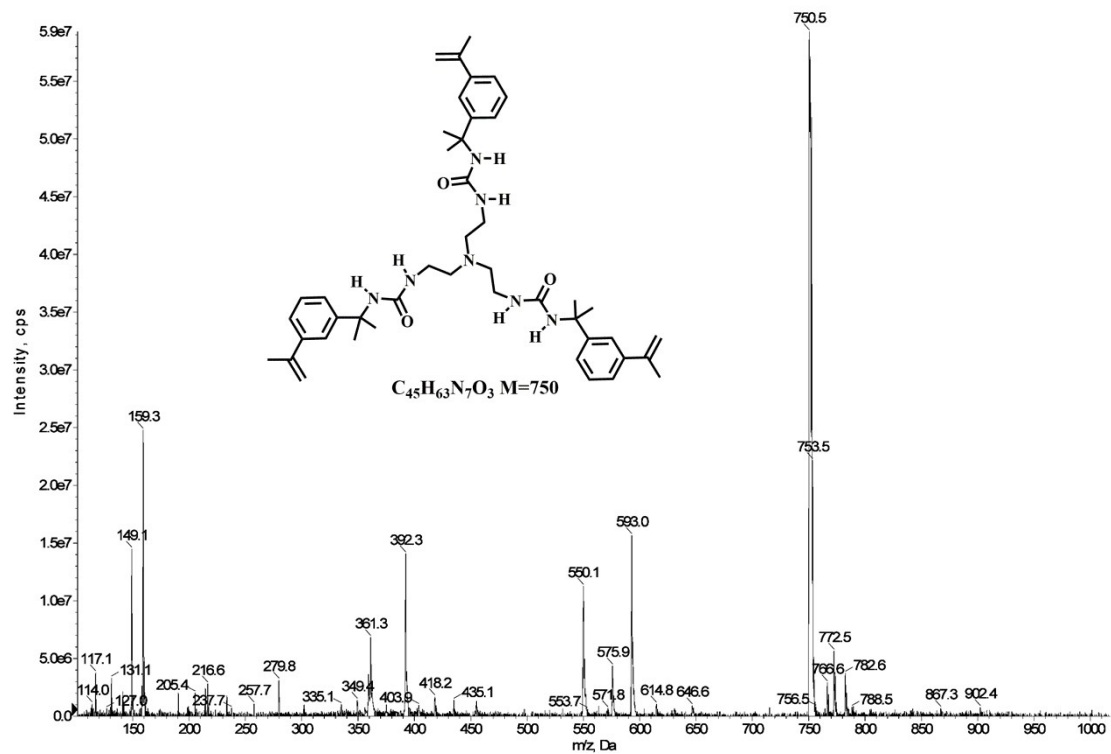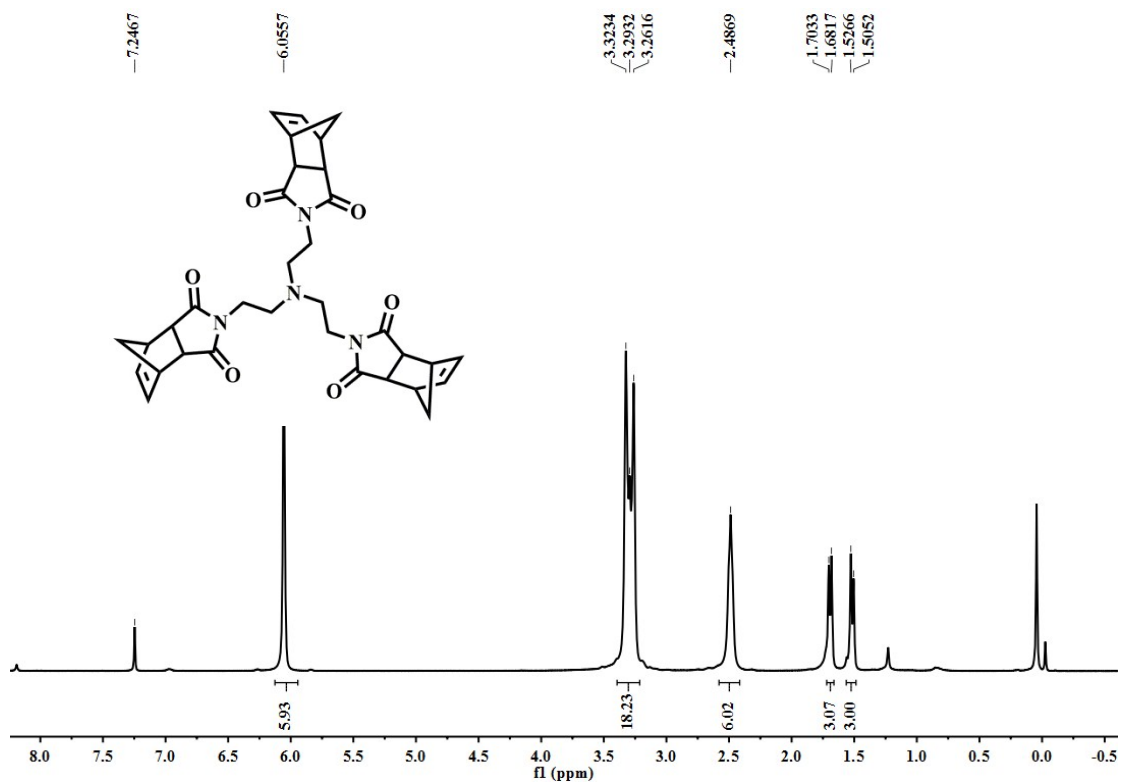

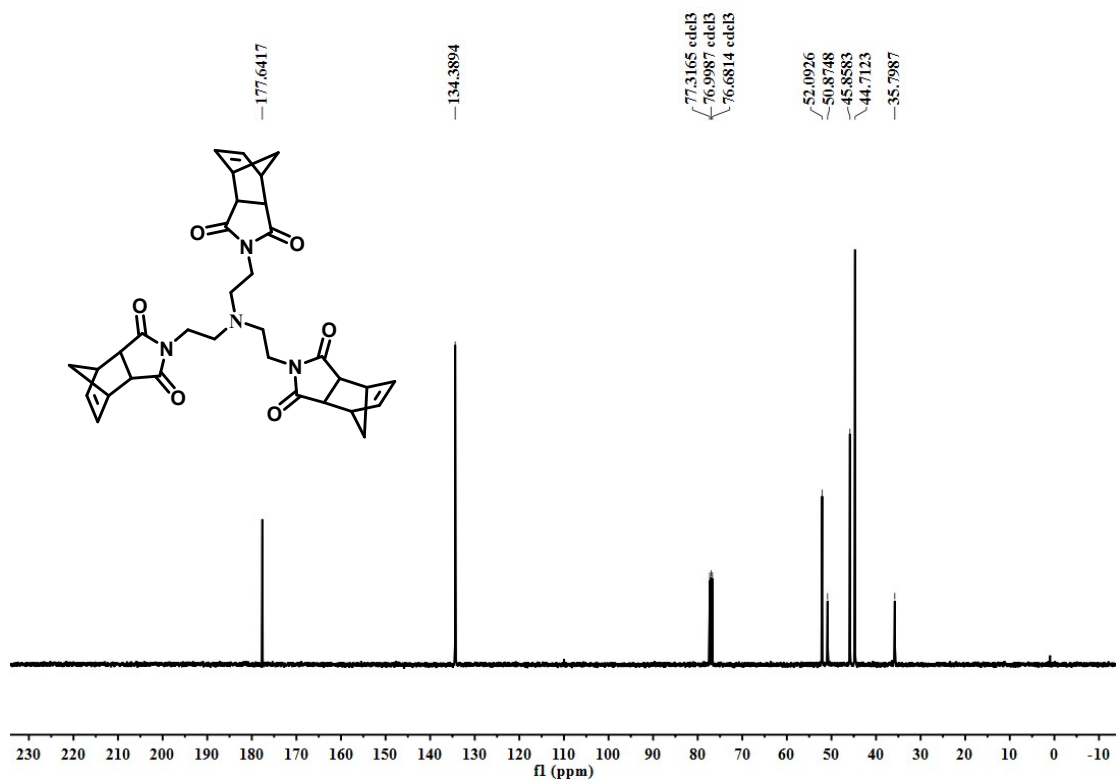

Figure S23. Compound 5 <sup>13</sup>C NMR (400 MHz, CDCl<sub>3</sub>)

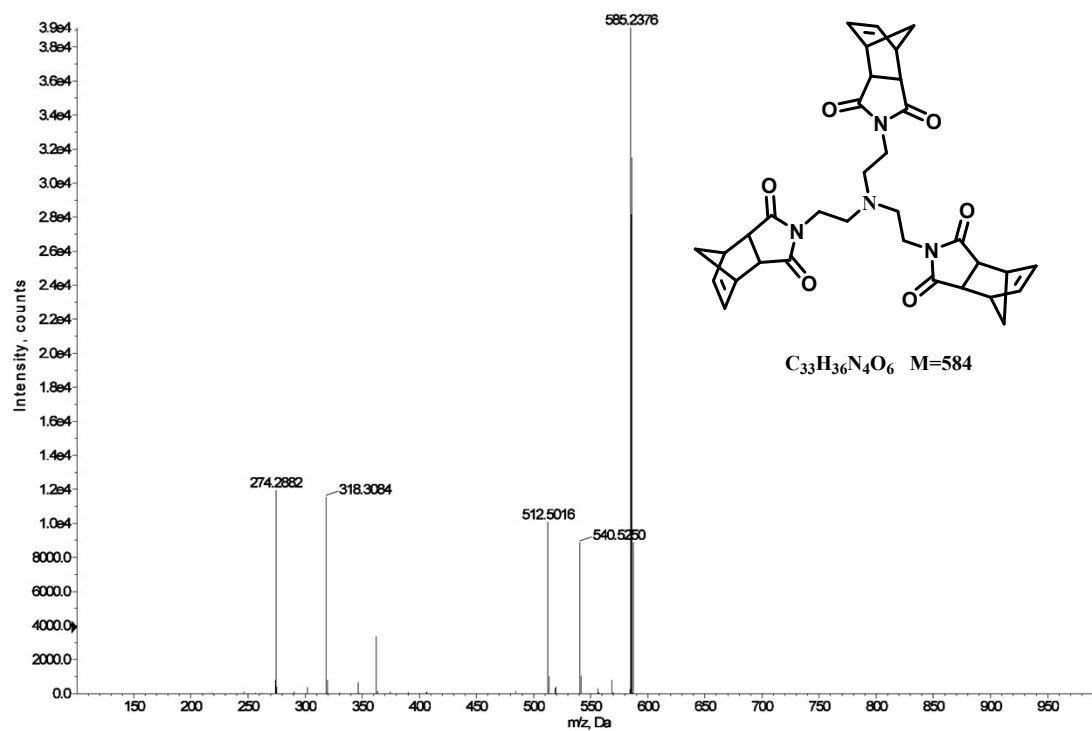

Figure S24. Compound 5 MS

### Adsorption kinetic of BHA/BHT

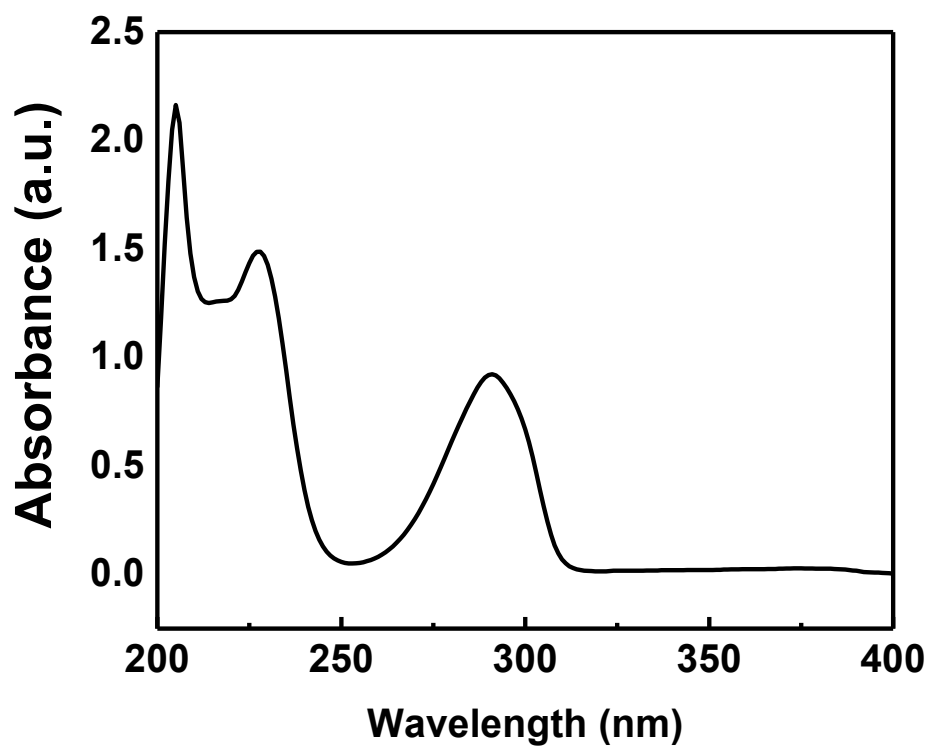

Figure S25 UV spectrum of 50 mg L<sup>-1</sup> BHA solution in methanol

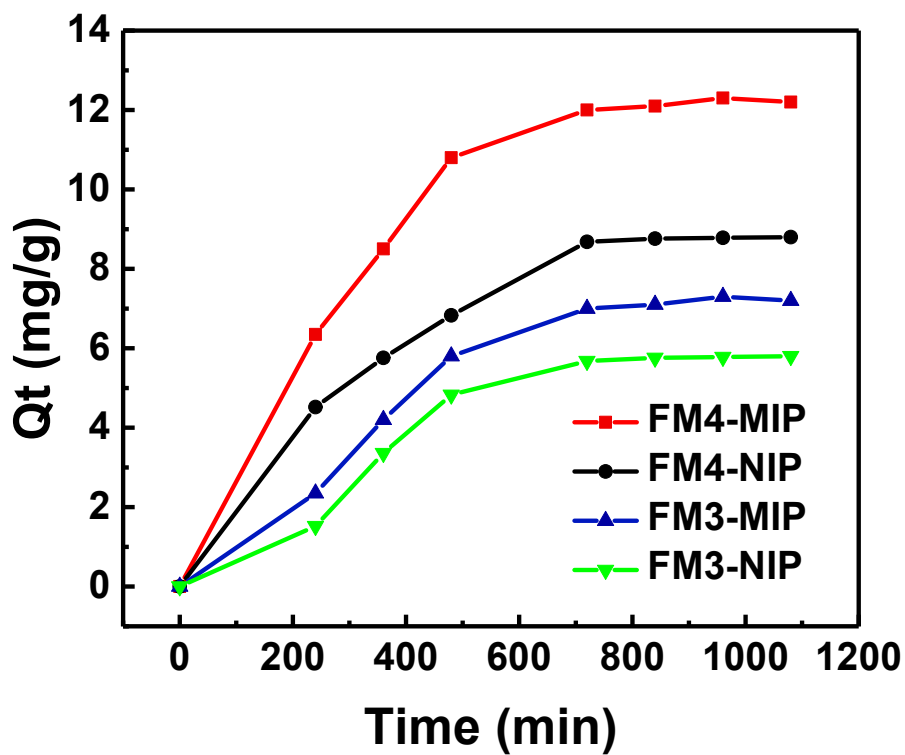

Figure S26 Adsorption kinetic curves for BHA of MIP and NIP

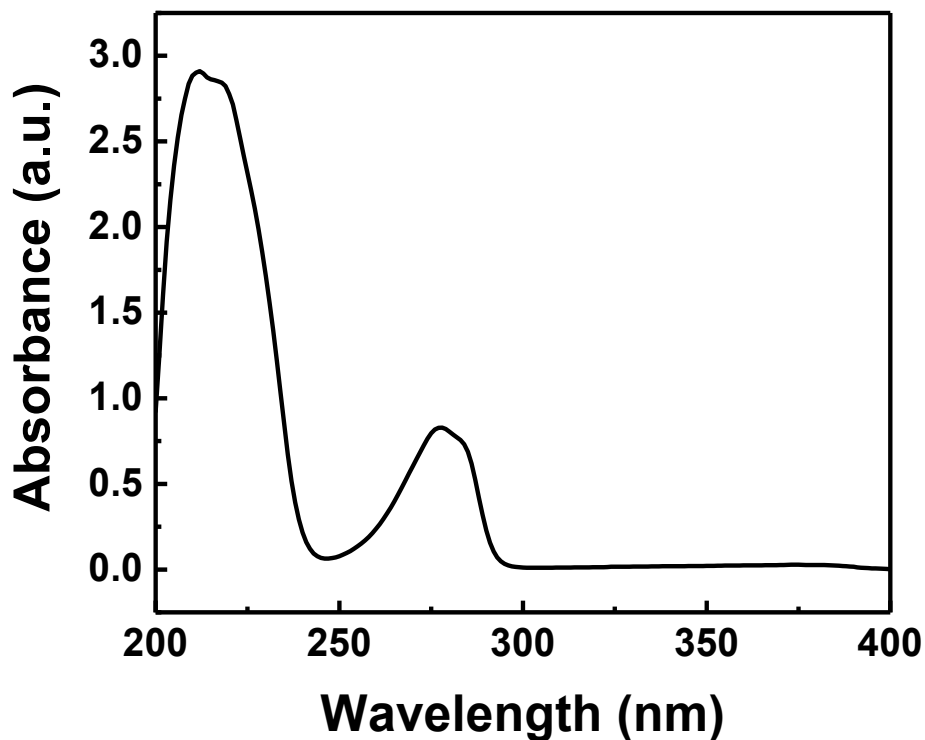

Figure S27 UV spectrum of 100 mg L<sup>-1</sup> BHT solution in methanol

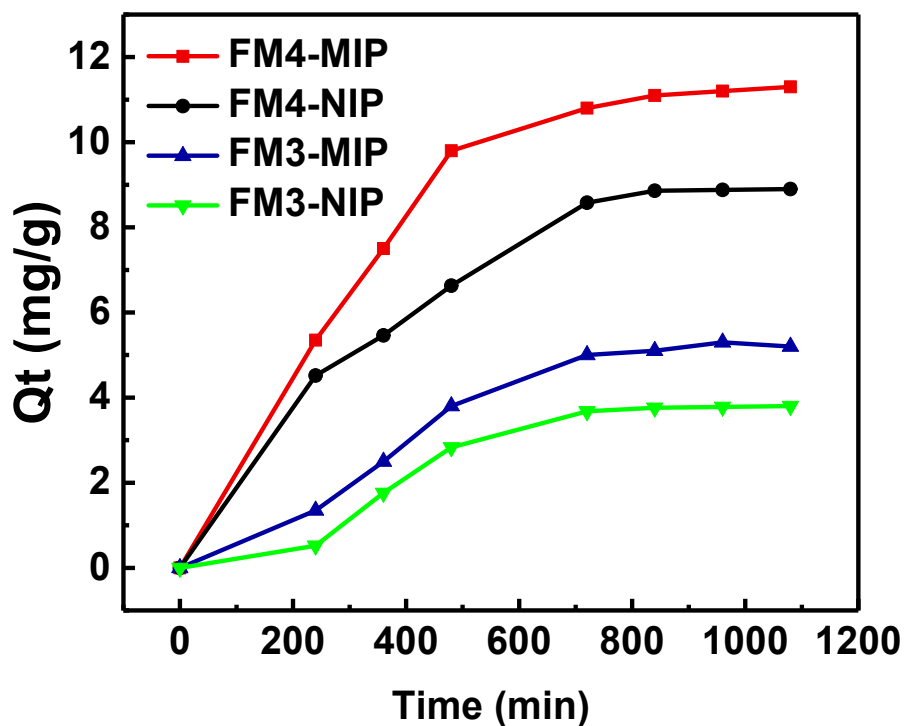

Figure S28 Adsorption kinetic curves for BHT of MIP and NIP
